# Supplementary material for: Connectivity Mapping Using a Novel sv2a Loss-of-Function Zebrafish Epilepsy Model as a Powerful Strategy for Anti-epileptic Drug Discovery
Source: Front Mol Neurosci. 2022 May 24;15:881933. doi: 10.3389/fnmol.2022.881933 (PMC9172968; doi:10.3389/fnmol.2022.881933)
Supplement: Supplementary Table 1 — Overview qPCR and HRM primers. [file Table_1.xlsx]

## Sheet: qPCR primers
	Forward primer	Reverse primer
sv2a	TGACCGACGAATACACCAAA	CCTGATACTCGCCCTCGTAG
abcg2b	GCCAGGACCAATTCTGACAT	CTTCCAGTTGCTCCCATGAT
fhl5	CACTTGCAAGAAGACCGTCA	GGCCTTTTTACAAGCACAGC
fabp1b.1	GTCACGACCGGATCAAAAGT	GAGCGTCAGAGTGTTGACCA
nr0b2a	AGCCGTGGAGAGTTCAGCTA	GAGCTTCAGCTGGTCTTTGG
apoda.1	TGAGAATTCGGCTCTGGTCT	TGCTCAAGATCATCCGACTG
gnrh3	TGGAGTGGAAAGGAAGGTTG	CCTGAATGTTGCCTCCATTT
fosl1a	GAAAGCAGCTCTGGATCGTC	CATCCATTGAAGGCTCTGGT
fosab	GCTCCATCTCAGTCCCAGAG	AGAGTGGGCTCCAGATCAGA
atf3	CTGTCCCAGAGGAGAACGAC	TGGTTCTTCAGCTCCTCGAT
tmem176l.3a	CTGTCTCCTCGAACCCAAAG	CTGTGTGCTTGACAGCGTCT
18s	TCGCTAGTTGGCATCGTTTATG	CGGAGGTTCGAAGACGATCA

## Sheet: HRM primers
	Forward primer	Reverse primer
sv2a	GCCACGGACGCTTCCAGTGG	CCCAGCACAAAGTAGAGGG
